# Supplementary material
Source: PubMed Central journal article supplement (PMC4178439)
Supplement: ASN.2013090986_ASN2013090986SupplementaryData.pdf [file ASN.2013090986_ASN2013090986SupplementaryData.pdf]

Namba\_Supplemental Figure 1

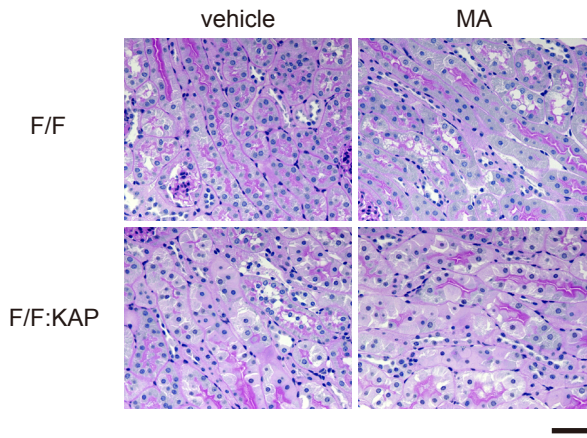

Namba\_Supplemental Figure 2

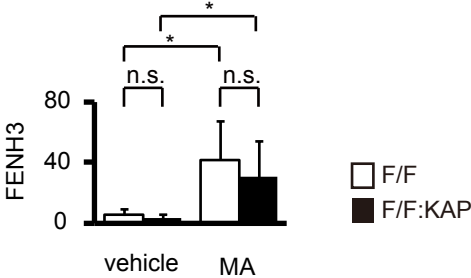

Namba\_Supplemental Figure 3

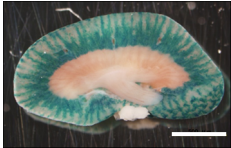

Namba\_Supplemental Figure 4

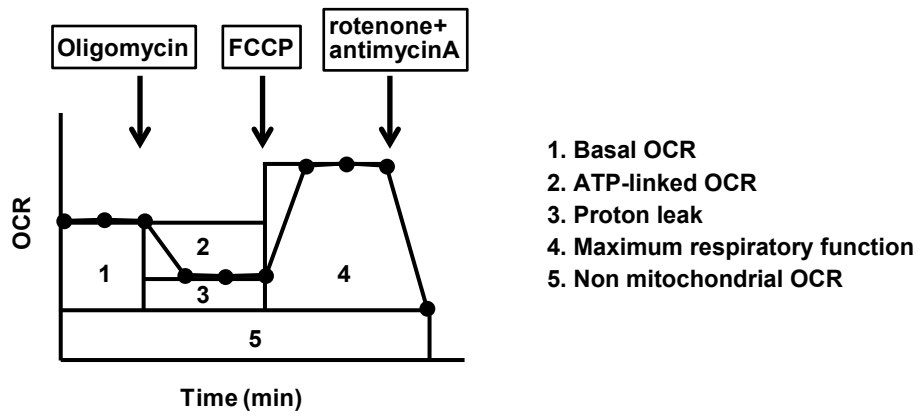

Namba\_Supplemental Figure 5

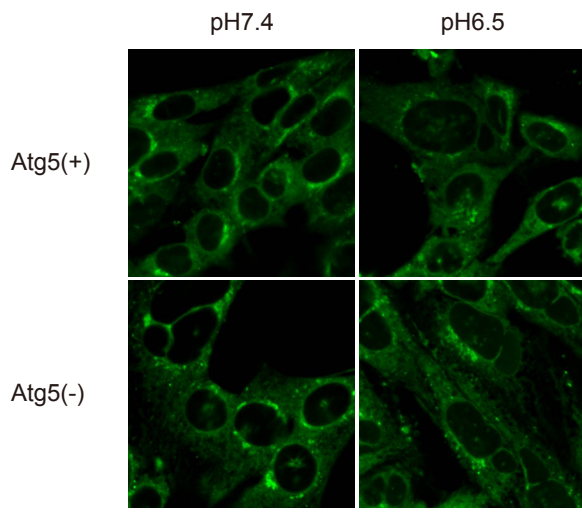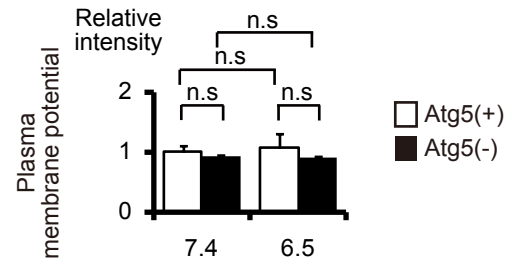

Namba\_Supplemental Figure 6

A

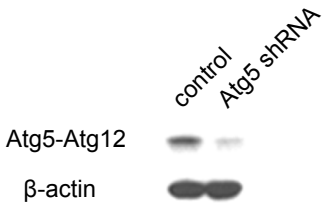

B

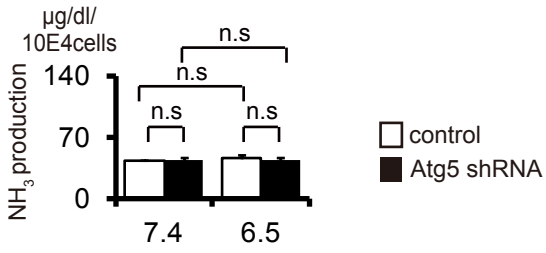

#### Supplemental Figure 1.

Light microscopic analysis of cortical lesion of kidneys under metabolic acidosis. On PAS staining, no remarkable change was seen in *Atg5<sup>F/F</sup>:KAP* mice between with vehicle treatment and acid-loading. *F/F*, *Atg5<sup>F/F</sup>* mice; *F/F:KAP*, *Atg5<sup>F/F</sup>:KAP* mice; MA, metabolic acidosis. Bars, 50  $\mu$ m.

#### Supplemental Figure 2.

Increased urinary excretion of ammonium under metabolic acidosis. Both control and *Atg5<sup>F/F</sup>:KAP* mice exhibited significantly increased urinary excretion of ammonium after acid-loading. *F/F*, *Atg5<sup>F/F</sup>* mice; *F/F:KAP*, *Atg5<sup>F/F</sup>:KAP* mice; MA, metabolic acidosis; FENH<sub>3</sub>, Fractional urinary excretion of ammonium. Asterisk indicates significant difference ( $P < 0.05$ ). n.s, not significant.

#### Supplemental Figure 3.

LacZ expression in the kidney of *KAP-Cre/CAG-CAT-Z* male mice. X-Gal stained kidney from male *KAP-Cre/CAG-CAT-Z* mice demonstrated that LacZ is expressed in tubules in the cortex and outer medulla (see also reference 15).

#### Supplemental Figure 4.

The fundamental parameters of mitochondrial function: basal respiration, ATP turnover, proton leak, and maximal respiration, or spare respiratory capacity.

#### Supplemental Figure 5.

Effect of acid loading on plasma membrane potential. The plasma membrane potential of *Atg5*-positive and -negative PTCs cultured under normal and acidic medium was determined by staining cells with DiBAC4(3) ( $n = 3$ , respectively). There was no significant difference in  $\Delta\psi_p$  between these cells regardless of acid-loading. All values are given as mean  $\pm$  SE. n.s, not significant. Bars, 10  $\mu$ m.

Supplemental Figure 6.

Effect of acid-loading and autophagy on ammoniagenesis in M-1 collecting duct cells. (A) Knockdown of *Atg5* by stable transfection of plasmid encoding *Atg5* shRNA was confirmed by Western blot analysis. The *Atg5* expression was reduced by 77% compared with scramble shRNA-expressing M-1 cells. (B) Ammoniagenesis in control and *Atg5*-knockdown M-1 cells cultured under normal and acidic medium ( $n = 3$ , respectively). All values are given as mean  $\pm$  SE. n.s, not significant.
